# Supplementary material for: Inorganic and organic geochemical fingerprinting of sediment sources and ocean circulation on a complex continental margin (São Paulo Bight, Brazil)
Source: Copernicus journal article supplement (doi:10.5194/os-13-209-2017), 2017-03-27
Supplement: Supplementary file 1 [file os-13-209-2017-supplement.zip]

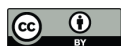

## *Supplement of*

# **Inorganic and organic geochemical fingerprinting of sediment sources and ocean circulation on a complex continental margin (São Paulo Bight, Brazil)**

**Michel Michaelovitch de Mahiques et al.**

*Correspondence to:* Michel Michaelovitch de Mahiques (mahiques@usp.br)

- os-13-209-2017-supplement-title-page.pdf
- SuppMat1.docx
- SuppMat2.xlsx
- SuppMat3.xlsx
- SuppMat4.xlsx

The copyright of individual parts of the supplement might differ from the CC-BY 3.0 licence.
